# Supplementary material for: Long-Term Outcomes in Stroke Patients with Cognitive Impairment: A Population-Based Study
Source: PubMed Central journal article supplement (PMC7345015; doi:10.3390/geriatrics5020032), 2020-05-18
Supplement: geriatrics-05-00032-s001.pdf [file geriatrics-05-00032-s001.pdf]

## Comorbidities:

Data collected on past medical history of each stroke patients admitted to hospital either self-reported or from hospital and primary care records. It includes a medical history of vascular risk factors; hypertension, diabetes mellitus, atrial fibrillation; disability (BI); past medical history of cognitive impairment or depression. It also considers pharmacological treatment prior to or at the time of the stroke including antiplatelet agents excluding aspirin (dipyridamole, or clopidogrel), aspirin, other than warfarin anticoagulants (heparin, novel or direct oral anticoagulant), warfarin. For this study, the use of these variables is considered with acknowledgment of that past medical history may not always be accurately, complete or systematically recorded in medical records. However, most of the data of past medical history used in this thesis is relevant to stroke management, and this likely improve its completeness and accuracy in medical records. Data on smoking was collected using validated questions. Patients are categorised as current smoker, ex-smoker or never smoker. If feasible, amount of tobacco smoked per day and the duration of being smokers for, are also recorded.

## Supplemental material

**Table S1.** Long-term outcomes by three-month cognitive impairment

| Cognitive impairment at 3 months | Outcome at 1 year |                 |         | Outcome at 5 years |                    |         |
|----------------------------------|-------------------|-----------------|---------|--------------------|--------------------|---------|
|                                  | N                 | Adjusted* RR    | p-value | N                  | Adjusted* RR       | p-value |
| Death                            | 2,514             | 2.7 (1.7-4.2)   | <0.001  | 2514               | 2.03 (1.54-2.68)   | <0.001  |
| Physical dependency              | 1,797             | 4.7 (3.3-6.5) † | <0.001  | 880                | 2.30 (1.38-3.82) † | 0.001   |
| Depression                       | 1391              | 2.1 (1.4-3.1) ‡ | <0.001  | 794                | 1.27 (0.79-2.04) ‡ | 0.316   |
| Institutionalised                | 1,813             | 3.7 (2.6-5.4)   | <0.001  | 909                | 2.20 (1.33-3.63)   | 0.002   |

\*adjusted for: year of stroke; socio-demographic factors; stroke type; vascular risk factors; smoking status; stroke severity measures; medications prior to stroke, recurrence of stroke and prior to stroke dementia.

† additionally adjusted for baseline disability.

‡ additionally adjusted for baseline depression.

**Table S2.** Five-year outcomes by change in cognitive function between seven-days and three-months.

| Change in cognitive function | Outcome at 5 years |           | N    | Adjusted* RR  | p-value |
|------------------------------|--------------------|-----------|------|---------------|---------|
|                              | No                 | Yes       |      |               |         |
| Death                        |                    |           | 1891 | 1.3 (1.0-1.6) | 0.05    |
| Stable                       | 447 (35%)          | 137 (24%) |      |               |         |
| Deteriorated                 | 385 (29%)          | 184 (33%) |      |               |         |
| Improved                     | 471 (35%)          | 237 (42%) |      |               |         |

|                                         |             |                      |     |                 |       |
|-----------------------------------------|-------------|----------------------|-----|-----------------|-------|
| Physical dependency                     | Independent | Dependent            | 680 |                 |       |
| Stable                                  | 199 (36%)   | 33 (24%)             |     |                 |       |
| Deteriorated                            | 154 (28%)   | 46 (34%)             |     | 1.5 (0.9-2.4) † | 0.123 |
| Improved                                | 192 (35%)   | 56 (41%)             |     | 1.5 (0.7-3.6) † | 0.27  |
| Depression                              | Normal      | Borderline/Depressed | 626 |                 |       |
| Stable                                  | 162 (38%)   | 63 (31%)             |     |                 |       |
| Deteriorated                            | 125 (29%)   | 59 (29%)             |     | 1.1 (0.7-1.5) ‡ | 0.783 |
| Improved                                | 137 (32%)   | 80 (39%)             |     | 1.0 (0.6-1.5) ‡ | 0.950 |
| Institutionalised                       | No          | Yes                  | 703 |                 |       |
| Stable                                  | 204 (35%)   | 34 (29%)             |     |                 |       |
| Deteriorated                            | 176 (30%)   | 32 (28%)             |     | 1.1 (0.6-1.8)   | 0.732 |
| Improved                                | 209 (35%)   | 48 (42%)             |     | 0.8 (0.5-1.5)   | 0.861 |
| The reference group is the stable group |             |                      |     |                 |       |

\*adjusted for: 7-day cognitive impairment, year of stroke; socio-demographic factors; stroke type; vascular risk factors; smoking status; stroke severity measures; medications prior to stroke and recurrence of stroke.

†additionally adjusted for baseline disability.

‡additionally adjusted for baseline depression.
